# Supplementary material for: Pilot Demonstration of a Strengthening Method for Steel-Bolted Connections Using Pre-Formable Carbon Fiber Cloth with VaRTM
Source: MDPI journal article supplement (doi:10.3390/ma14092184), 2021-04-24
Supplement: s1 [file s1]

## Article

# Pilot Demonstration of a Strengthening Method for Steel-Bolted Connections Using Pre-Formable Carbon Fiber Cloth with VaRTM

Takahiro Matsui <sup>1</sup>, Kohei Suzuki <sup>2</sup>, Sota Sato <sup>2</sup>, Yuki Kubokawa <sup>3</sup>, Daiki Nakamoto <sup>3</sup>, Shijir Davaakhishig <sup>3</sup> and Yukihiro Matsumoto <sup>3,\*</sup>

<sup>1</sup> ACM Technology Dept., Toray Industries, Inc., 2-1-1 Nihonbashimuromachi, Chuo-ku, Tokyo 103-8666, Japan; takahiro.matsui.f3@mail.toray

<sup>2</sup> Technical Development Headquarters, Constec Engi, Co., Ltd., 6-1-1 Heiwajima, Ota-ku, Tokyo 143-0006, Japan; suzuki-kohei@cons-hd.co.jp (K.S.); sato-sota@cons-hd.co.jp (S.S.)

<sup>3</sup> Department of Architecture and Civil Engineering, Toyohashi University of Technology, 1-1 Hibarigaoka, Tempaku-cho, Toyohashi, Aichi 441-8580, Japan; kubokawa.yuki.vo@tut.jp (Y.K.); nakamoto.daiki.md@tut.jp (D.N.); shijir.davaakhishig.hj@tut.jp (S.D.)

\* Correspondence: y-matsum@ace.tut.ac.jp; Tel.: +81-532-44-6845

**Citation:** Matsui, T.; Suzuki, K.; Sato, S.; Kubokawa, Y.; Nakamoto, D.; Davaakhishig, S.; Matsumoto, Y. Pilot Demonstration of a Strengthening Method for Steel-Bolted Connections Using Pre-Formable Carbon Fiber Cloth with VaRTM. *Materials* **2021**, *14*, x. <https://doi.org/10.3390/xxxxx>

Academic Editor: Jose Sena-Cruz

Received: 15 March 2021

Accepted: 21 April 2021

Published: 24 April 2021

**Publisher's Note:** MDPI stays neutral with regard to jurisdictional claims in published maps and institutional affiliations.

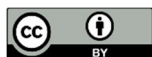

**Copyright:** © 2021 by the authors. Licensee MDPI, Basel, Switzerland. This article is an open access article distributed under the terms and conditions of the Creative Commons Attribution (CC BY) license (<http://creativecommons.org/licenses/by/4.0/>).

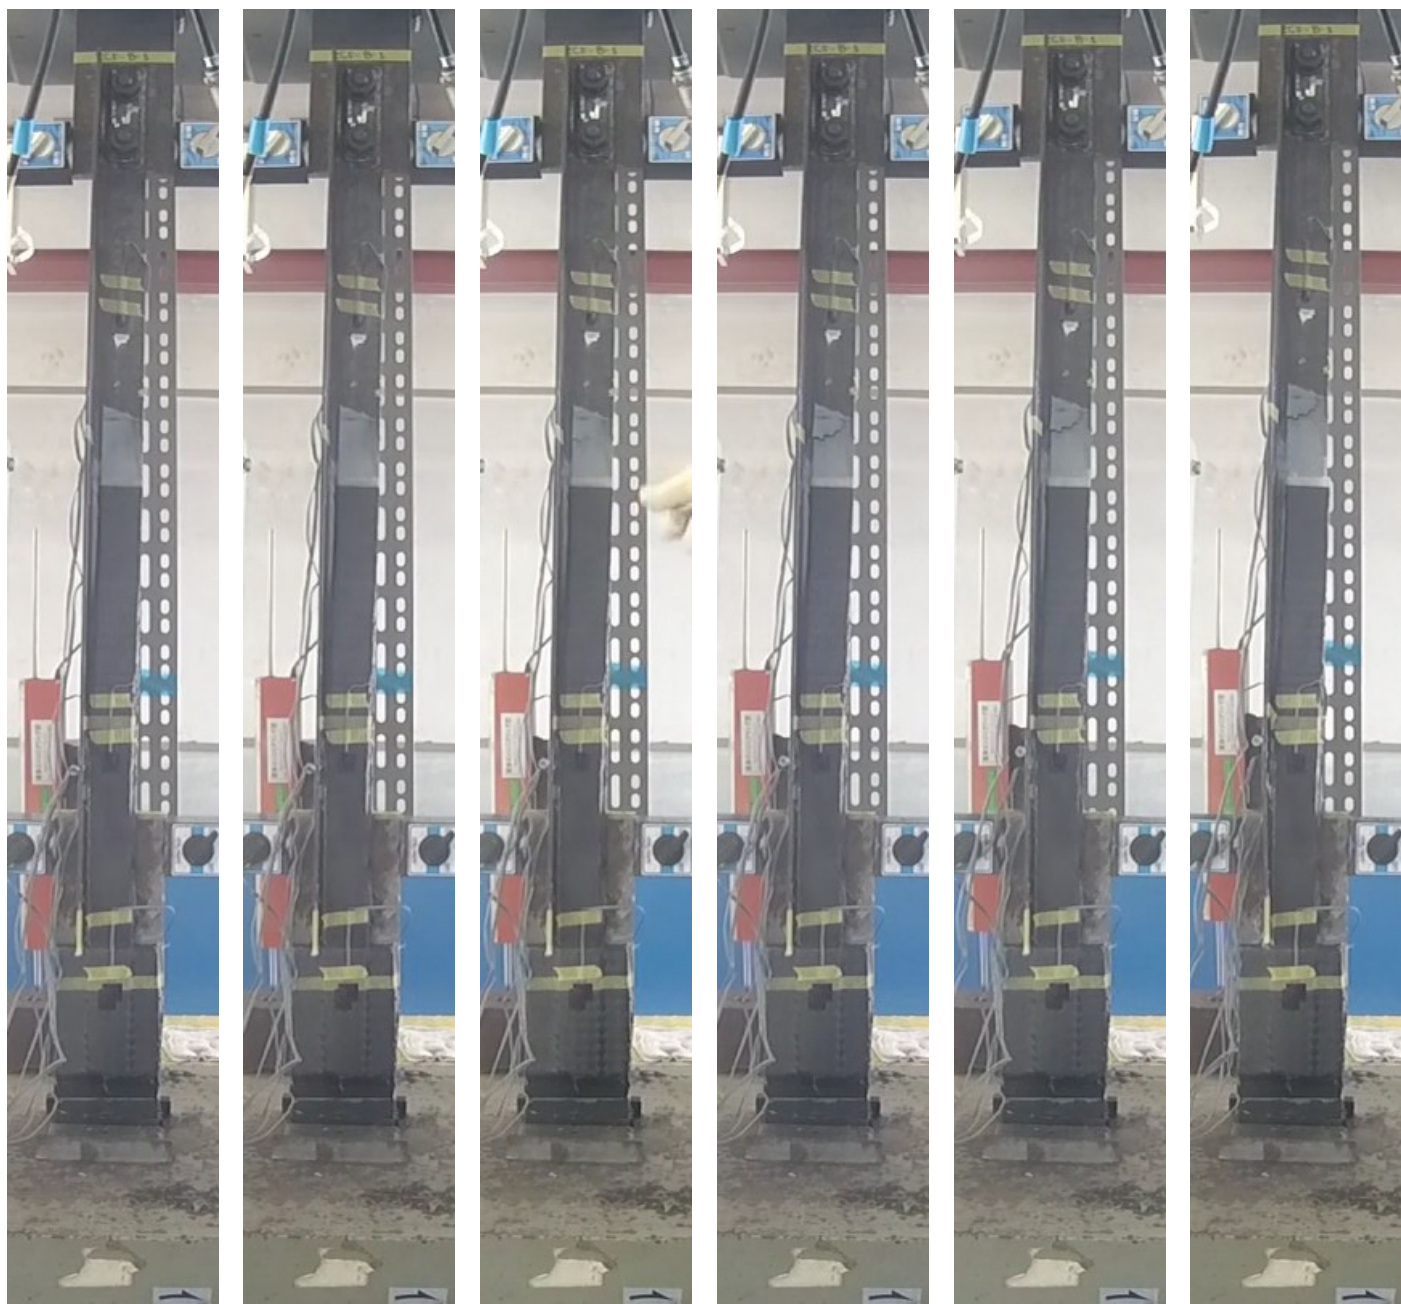

Figure S1. Experimental video of CFRP strengthening specimen.
